# Supplementary material for: Insights into the spontaneous multi-scale supramolecular assembly in an ionic liquid-based extraction system
Source: Royal Society of Chemistry journal article supplement (doi:10.1039/d2cp03389e), 2022-01-01
Supplement: d2cp03389e1.pdf [file d2cp03389e1.pdf]

## Electronic Supplementary Information

### **Insights into the spontaneous multi-scale supramolecular assembly in ionic liquid based extraction system**

Baihua Chen<sup>‡a</sup>, Ce Shi<sup>‡b</sup>, Shijie Xiong<sup>‡b</sup>, Kaige Wu<sup>b</sup>, Yanqiu Yang<sup>a</sup>, Wanjun Mu<sup>a</sup>,  
Xingliang Li<sup>a</sup>, Yuchuan Yang<sup>a</sup>, Xinghai Shen<sup>\*b</sup>, and Shuming Peng<sup>\*b</sup>

<sup>‡</sup>These authors contributed equally to this work.

<sup>a</sup> Institute of Nuclear Physics and Chemistry, China Academy of Engineering Physics, Mianyang 621999, P. R. China. E-mail: [pengshuming@caep.cn](mailto:pengshuming@caep.cn)

<sup>b</sup> Beijing National Laboratory for Molecular Sciences (BNLMS), Fundamental Science on Radiochemistry and Radiation Chemistry Laboratory, Center for Applied Physics and Technology, College of Chemistry and Molecular Engineering, Peking University, Beijing 100871, P. R. China. E-mail: [xshen@pku.edu.cn](mailto:xshen@pku.edu.cn)

## Supplementary Figures and Tables

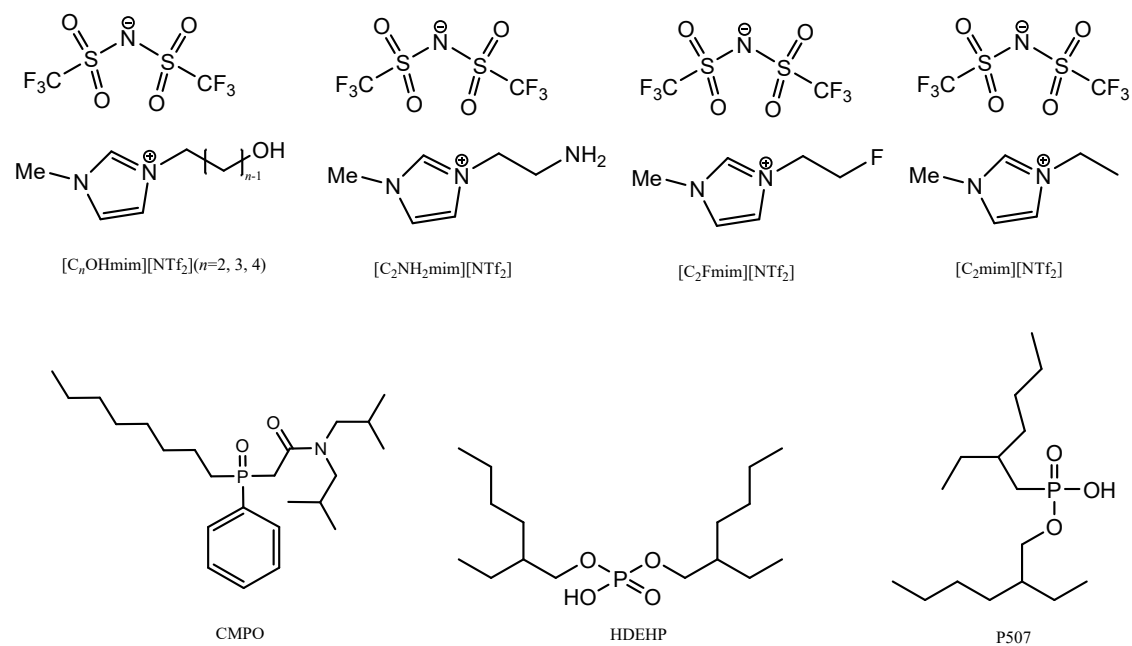

Figure S1 Structures of ILs and extractants involved in this work.

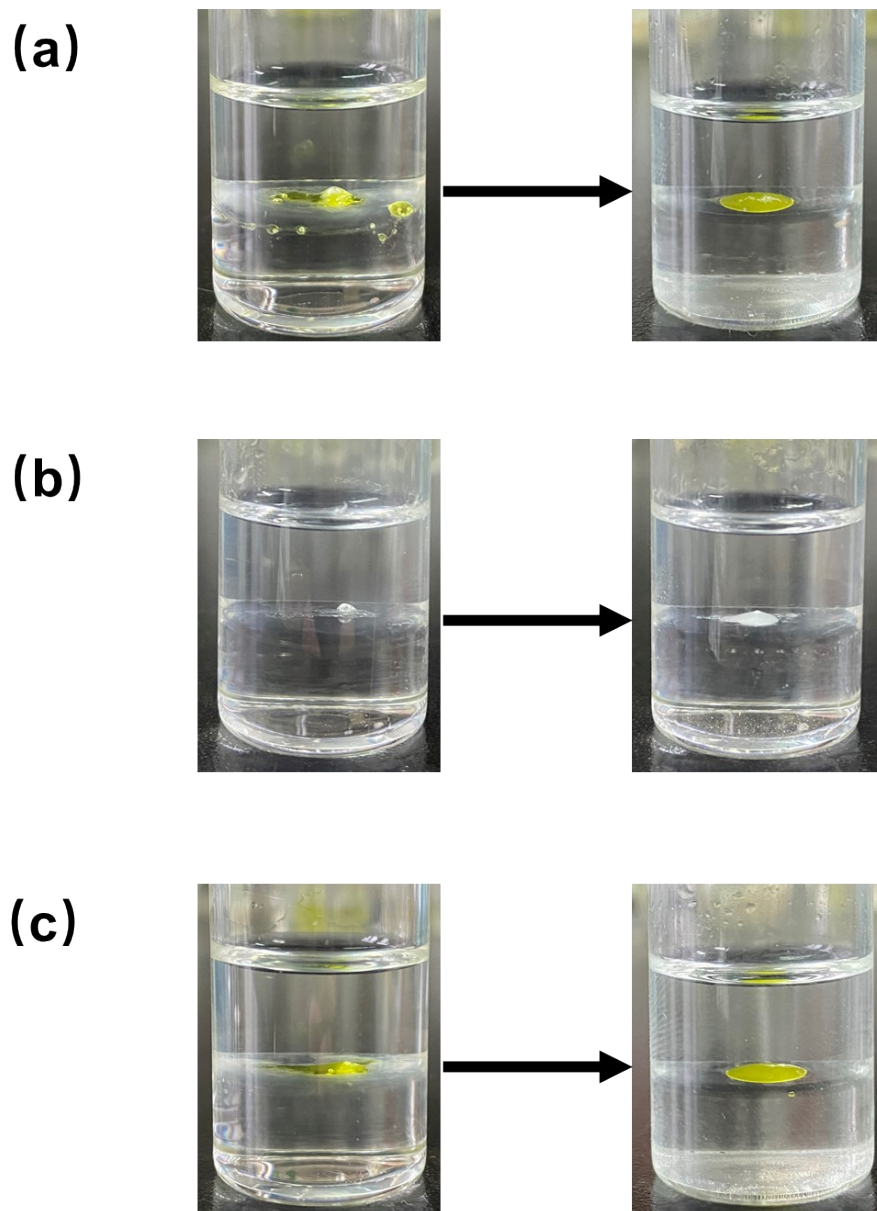

Figure S2 The pictures of the MSSA systems left for one day and one week at 10 °C. The aqueous solutions of metal ions (a. 10 mM  $\text{UO}_2^{2+}$ , b. 10 mM  $\text{Al}^{3+}$ , c. 10 mM  $\text{UO}_2^{2+}$  and 10 mM  $\text{Al}^{3+}$ ) with 0.1 M nitric acid were mixed with the solutions of 60 mM CMPO in  $\text{C}_2\text{OHmimNTf}_2$ . Left: one day. Right: one week. Several macroscopic assemblies were formed in the IL-water interface and then they aggregated into the single MA sphere. From the pictures of U-MSSA system and Al-MSSA system left for 1d, we can see the rate of the U-MSSA process is higher than that of the Al-MSSA process.

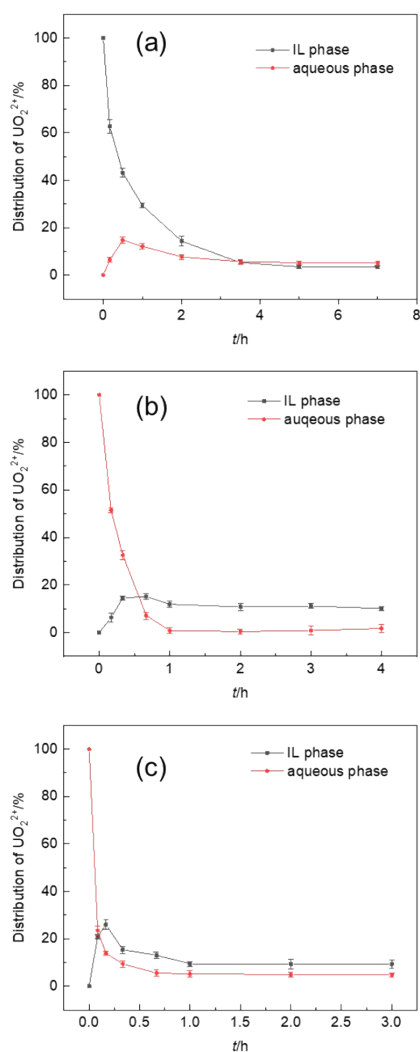

Figure S3 Distribution of  $\text{UO}_2^{2+}$  in aqueous phase and IL phase against time in the initial stage of the MSSA process at different temperatures: (a) 25 °C. (b) 30 °C. (c) 40 °C. 10 mM  $\text{UO}_2^{2+}$  solutions with 0.1 M  $\text{HNO}_3$  were mixed with 60 mM CMPO/ $\text{C}_2\text{OHmimNTf}_2$  at different temperatures. The uranyl content in the aqueous phase declines sharply, while that in the IL phase is enhanced at first and then goes down. Both of them reach a platform at about 1 to 2 h depending on the temperature. This result indicates that uranyl can be extracted to the IL phase and then uranyl would move to the interface. The first step of the MSSA process is the cation exchange.

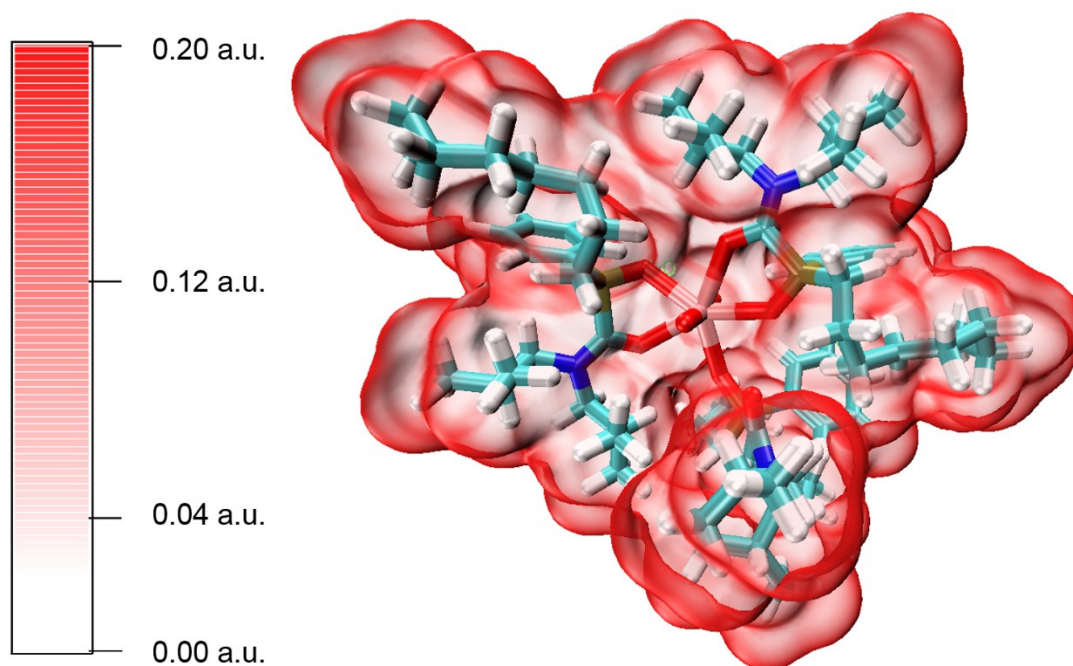

Figure S4 The molecular electrostatic potential of  $[\text{UO}_2(\text{CMPO})_3]^{2+}$ . The red cover means that  $[\text{UO}_2(\text{CMPO})_3]^{2+}$  has positive electrostatic potential. On the surface of  $[\text{UO}_2(\text{CMPO})_3]^{2+}$ , the deeper red colour means the more positive electrostatic potential. The  $[\text{UO}_2(\text{CMPO})_3]^{2+}$  has hydrophobic organic chains with positive electrostatic potential which is essential in construction of the EBB.

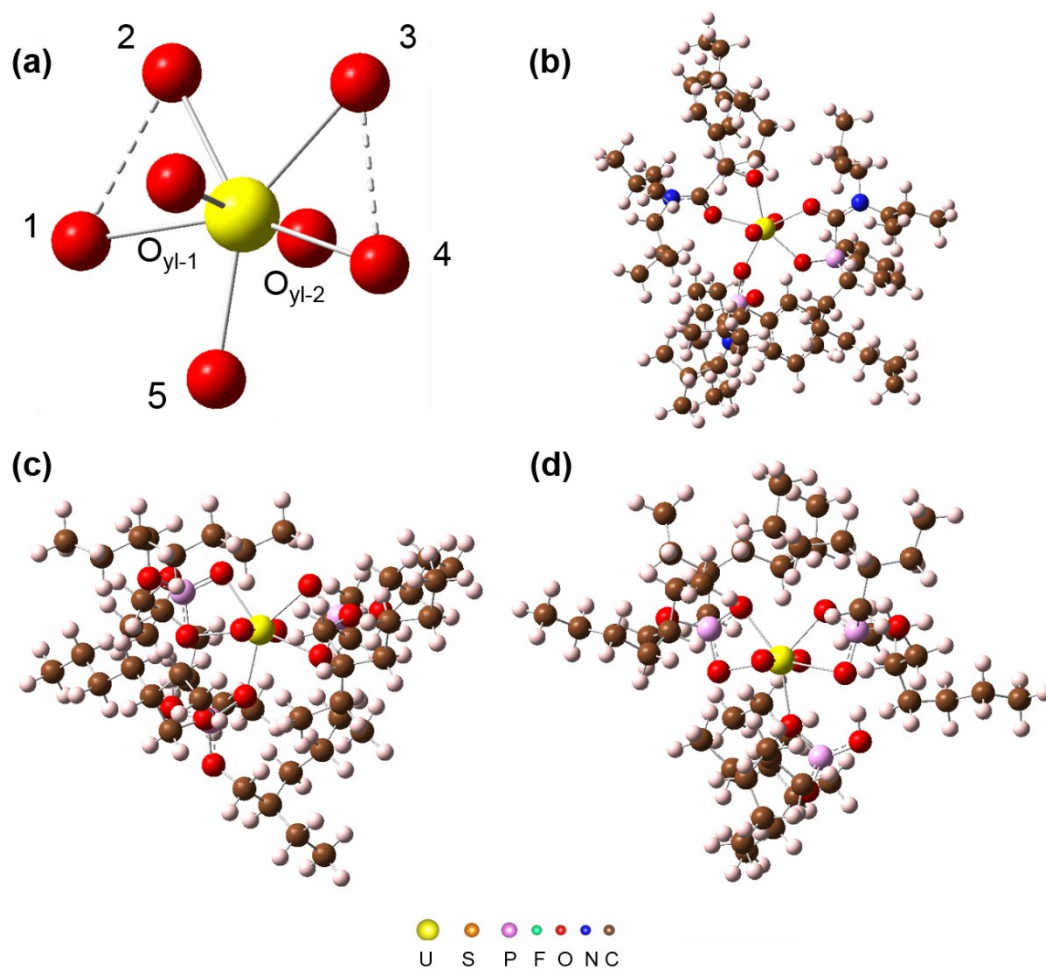

Figure S5 (a) Coordination between uranyl and three bidentate ligands. Oxygen atoms **1** and **2** are from the first ligand while **3** and **4** from the second ligand respectively. Oxygen atom **5** is from the third ligand. (b, c, d) The 1:3 complex structures between uranyl and CMPO, HDEHP, P507, respectively.

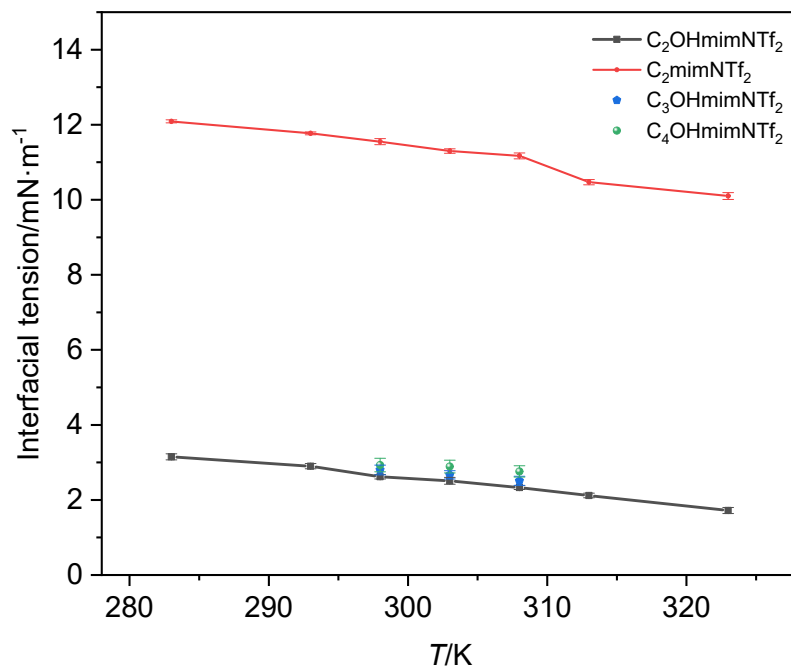

Figure S6 The interfacial tension for C<sub>2</sub>mimNTf<sub>2</sub>-water and C<sub>n</sub>OHmimNTf<sub>2</sub> (n=2, 3, 4)-water interfaces against the temperature.

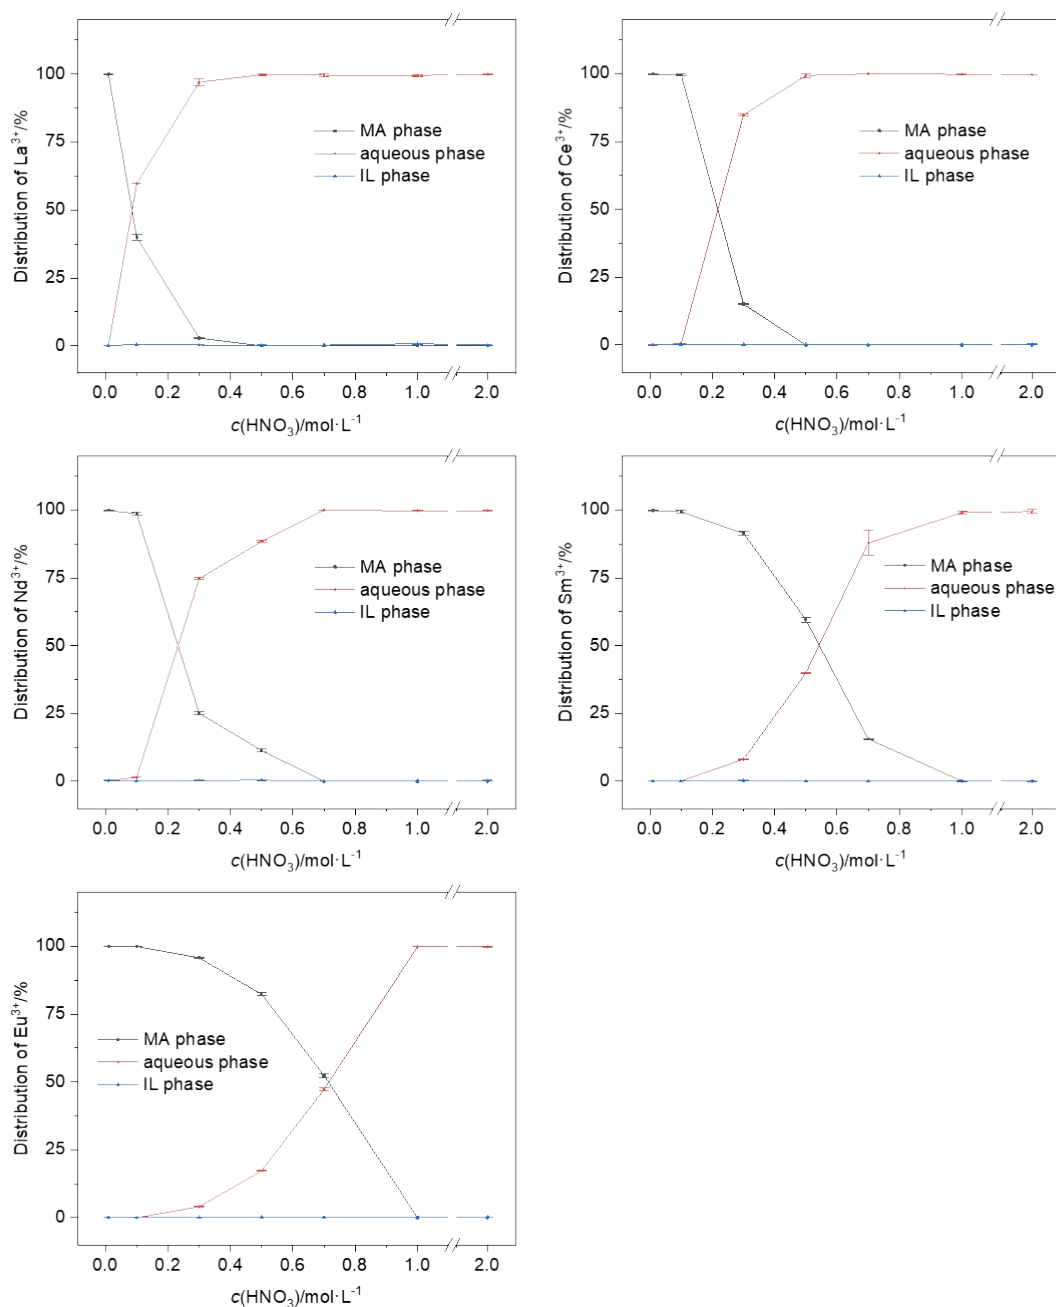

Figure S7 MSSA-based separation of La<sup>3+</sup>(a), Ce<sup>3+</sup>(b), Nd<sup>3+</sup>(c), Sm<sup>3+</sup>(d), Eu<sup>3+</sup>(e) under different HNO<sub>3</sub> concentrations in HDEHP-C<sub>2</sub>OHmimNTf<sub>2</sub> system. Aqueous solutions of 10 mM M<sup>3+</sup> with different concentrations of nitric acid are mixed with 60 mM HDEHP/C<sub>2</sub>OHmimNTf<sub>2</sub> and MSSA-based separation experiments last for 3 days. La<sup>3+</sup>, Ce<sup>3+</sup>, Nd<sup>3+</sup>, Sm<sup>3+</sup>, Eu<sup>3+</sup> exhibited similar behaviors at different concentration of nitric acid. All of them remained in the aqueous phase when the concentration of nitric acid was greater than 1 M.



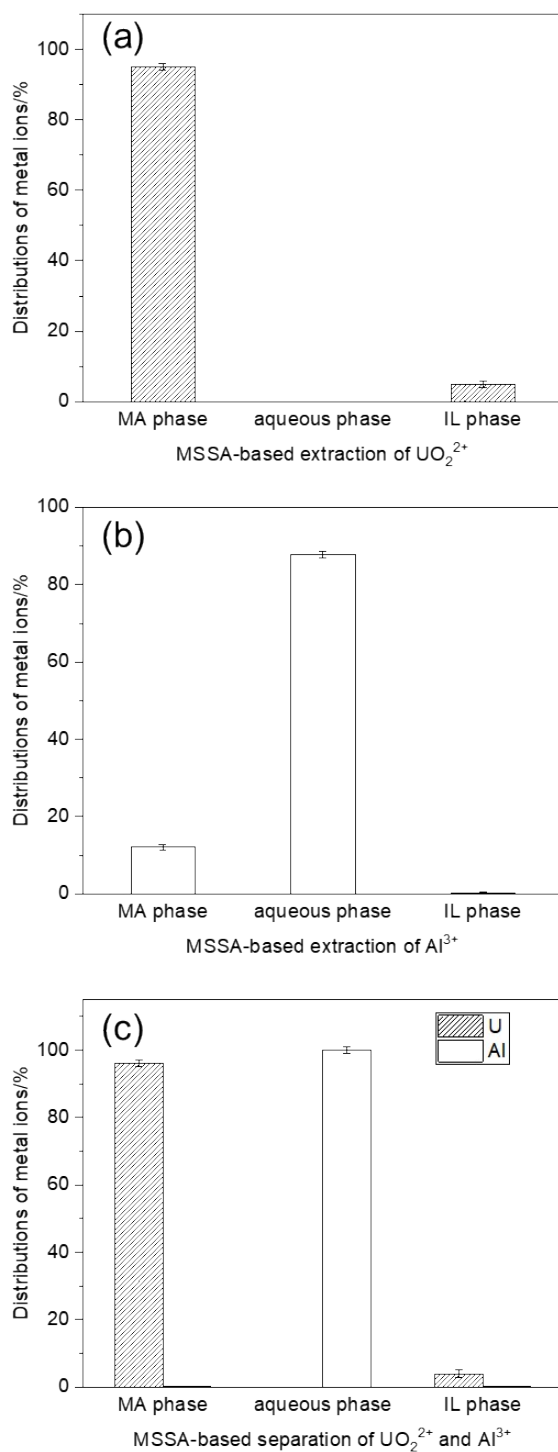

Figure S8 MSSA-based separation of  $\text{UO}_2^{2+}$  and  $\text{Al}^{3+}$  at 10 °C . The distributions of metal ions when they are extracted from the solution of 10 mM  $\text{UO}_2^{2+}$  with 0.1 M nitric acid (a), the solution of 10 mM  $\text{Al}^{3+}$  with 0.1 M nitric acid (b), the mixed solution of 10 mM  $\text{UO}_2^{2+}$  and  $\text{Al}^{3+}$  with 0.1 M nitric acid (c). MSSA-based separation experiments lasted for 7 days at 10 °C. In the mixed solution of  $\text{UO}_2^{2+}$  and  $\text{Al}^{3+}$ , almost all  $\text{Al}^{3+}$  ions still remain in the aqueous phase while  $\text{UO}_2^{2+}$  can be selectively extracted into the MA phase.

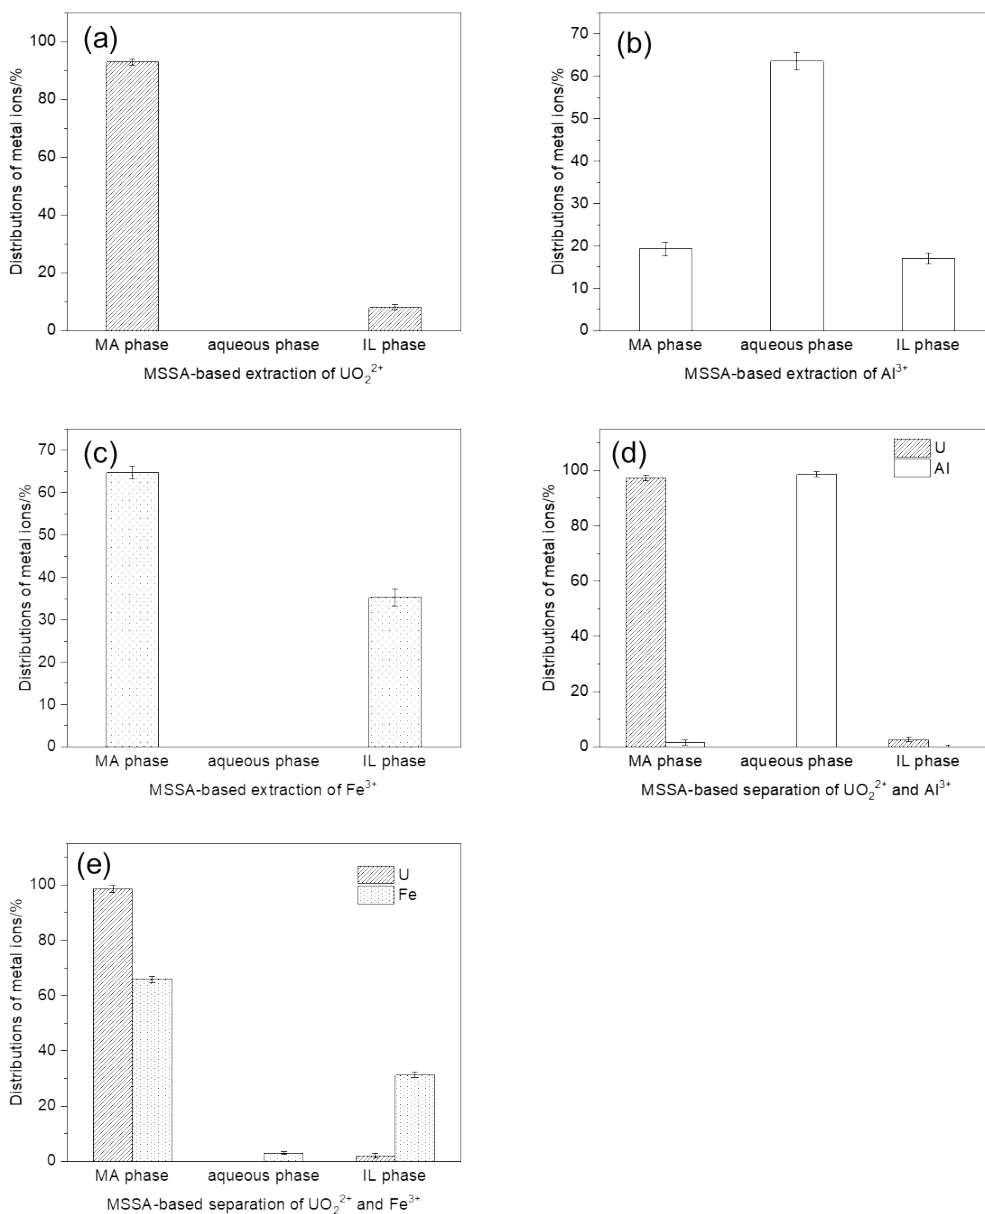

Figure S9 MSSA-based separation of  $\text{UO}_2^{2+}$  and  $\text{Al}^{3+}$ ,  $\text{Fe}^{3+}$  at 20 °C . The distributions of metal ions when they are extracted from the solution of 10 mM  $\text{UO}_2^{2+}$  with 0.1 M nitric acid (a), the solution of 10 mM  $\text{Al}^{3+}$  with 0.1 M nitric acid (b), the solution of 10 mM  $\text{Fe}^{3+}$  with 0.1 M nitric acid (c), the mixed solution of 10 mM  $\text{UO}_2^{2+}$  and  $\text{Al}^{3+}$  with 0.1 M nitric acid (d) and the mixed solution of 10 mM  $\text{UO}_2^{2+}$  and  $\text{Al}^{3+}$  with 0.1 M nitric acid (e). MSSA-based separation experiments lasted for 7 days at 20 °C. In the mixed solution of  $\text{UO}_2^{2+}$  and  $\text{Al}^{3+}$ , almost all  $\text{Al}^{3+}$  ions still remain in the aqueous phase while  $\text{UO}_2^{2+}$  can be selectively extracted into the MA phase. The amount of  $\text{Al}^{3+}$  extracted to the MA phase and IL phase is very small if any. But in the mixed solution of  $\text{UO}_2^{2+}$  and  $\text{Fe}^{3+}$ , both  $\text{UO}_2^{2+}$  and  $\text{Fe}^{3+}$  can be extracted to the MA phase and IL phase.

Table S1. The axial O=U=O bond angles and bond lengths of U-O coordination bonds of 1:3 complex structures between uranyl and CMPO, HDEHP, P507, respectively.

| Structural parameter    | CMPO  | HDEHP | P507  |
|-------------------------|-------|-------|-------|
| O=U=O/deg               | 176.0 | 177.1 | 178.3 |
| U-O <sub>1</sub> /pm    | 247   | 240   | 259   |
| U-O <sub>2</sub> /pm    | 238   | 240   | 253   |
| U-O <sub>3</sub> /pm    | 248   | 241   | 254   |
| U-O <sub>4</sub> /pm    | 235   | 262   | 251   |
| U-O <sub>5</sub> /pm    | 231   | 235   | 255   |
| U-O <sub>y1-1</sub> /pm | 177   | 177   | 176   |
| U-O <sub>y1-2</sub> /pm | 177   | 177   | 174   |

The numbers of oxygen atoms are consistent with those in Fig. S5, ESI†.

Table S2. Diameters of EBB, the cavity in EBB capturing imidazolium cation and length of imidazolium cations for different IL system.

|                                 | C <sub>2</sub> mimNTf <sub>2</sub> | C <sub>2</sub> OHmimNTf <sub>2</sub> | C <sub>3</sub> OHmimNTf <sub>2</sub> |
|---------------------------------|------------------------------------|--------------------------------------|--------------------------------------|
| Diameters of EBB/nm             | 2.8                                | 2.3                                  | 3.0                                  |
| Diameters of the cavity/pm      | 980                                | 972                                  | 1198                                 |
| Length of imidazolium cation/pm | 751                                | 839                                  | 965                                  |

Table S3. Elemental analysis results of the Fe-MA.

| Batch | C/%   | H/%  | N/%  |
|-------|-------|------|------|
| A     | 42.98 | 5.84 | 4.51 |
| B     | 43.04 | 5.83 | 4.50 |
| cal   | 42.97 | 5.79 | 4.35 |

The Fe-MA was taken out with a tweezer and placed in a petri dish with an air-drying for a week. The results are quite close to that of assembly made up of  $[\text{Fe}(\text{CMPO})_3]^{3+}:[\text{C}_2\text{OHmim}]^+:[\text{NTf}_2]^-$  in a molar ratio of 3:1:10.
